# Supplementary material
Source: PubMed Central journal article supplement (PMC4407856)

SUPPLEMENTARY DATA

**Supplementary Figure 1.** Podocyte *sema3a* expression is increased in diabetic mice. IHC: immunoreactive *sema3a* (red) and podocin (green) co-localization (merge, yellow) indicates that *sema3a* is expressed in podocytes. Clearly, *sema3a* expression is increased in glomeruli from diabetic mice with *sema3a* gain-of-function (bottom panel), as compared to control diabetic mice (top panel), whereas podocin expression is not different.

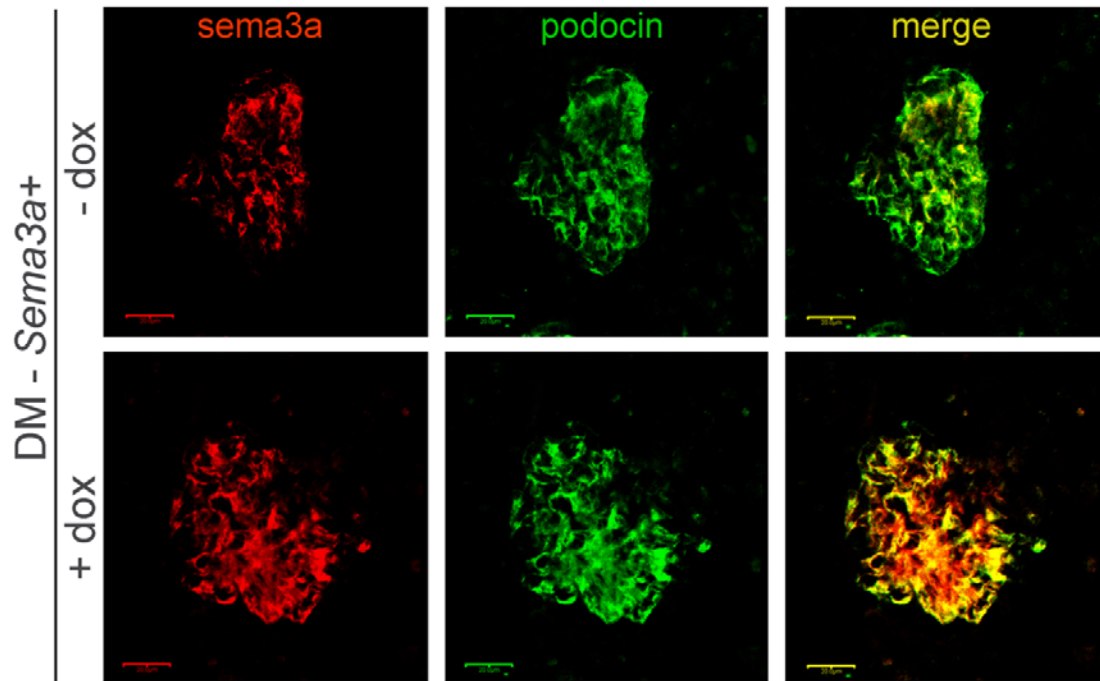

**Supplementary Figure 2.** Blood glucose (A) and body weight (B) at the completion of the study period are similar in all diabetic experimental groups. Data are expressed as mean+SEM, n.s.= not significantly different.

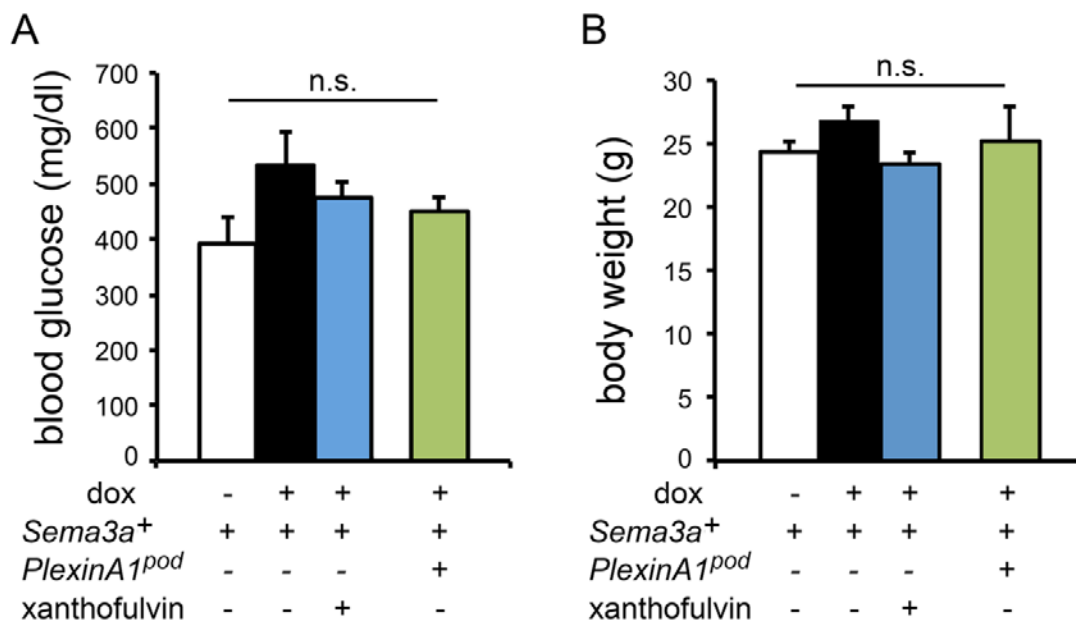

Supplement: supp_db14-0719_DB140719SupplementaryData.pdf [file supp_db14-0719_DB140719SupplementaryData.pdf]
